# Supplementary material
Source: PubMed Central journal article supplement (PMC3058628)
Supplement: NIHMS235608-supplement-3.pdf [file NIHMS235608-supplement-3.pdf]

# Ding *et al.* supplementary information

## Supplementary Fig. 1

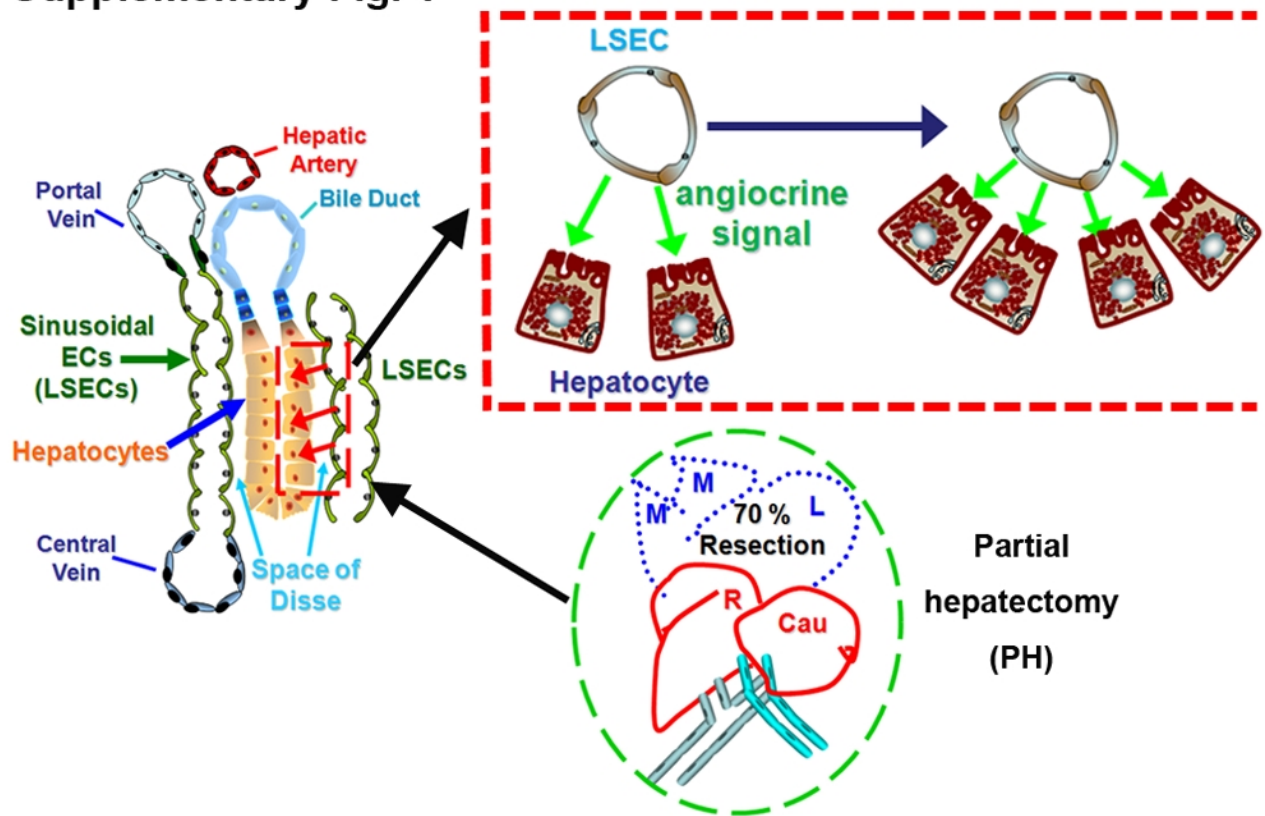

**Supplementary Fig. 1 Inductive role of liver sinusoidal endothelial cell (LSEC)-derived angiocrine signal in liver regeneration.** LSECs lining the liver sinusoid are positioned to the vicinity of hepatocytes. Upon resection of 70% of liver mass (partial hepatectomy, PH), inductive angiogenic but non-proliferative LSECs initiate and sustain the regeneration of proximal hepatocytes, through the elaboration of specific angiocrine signals. M, R, L, and Cau; median, right, left, and caudate lobes of the liver.

## Supplementary Fig. 2

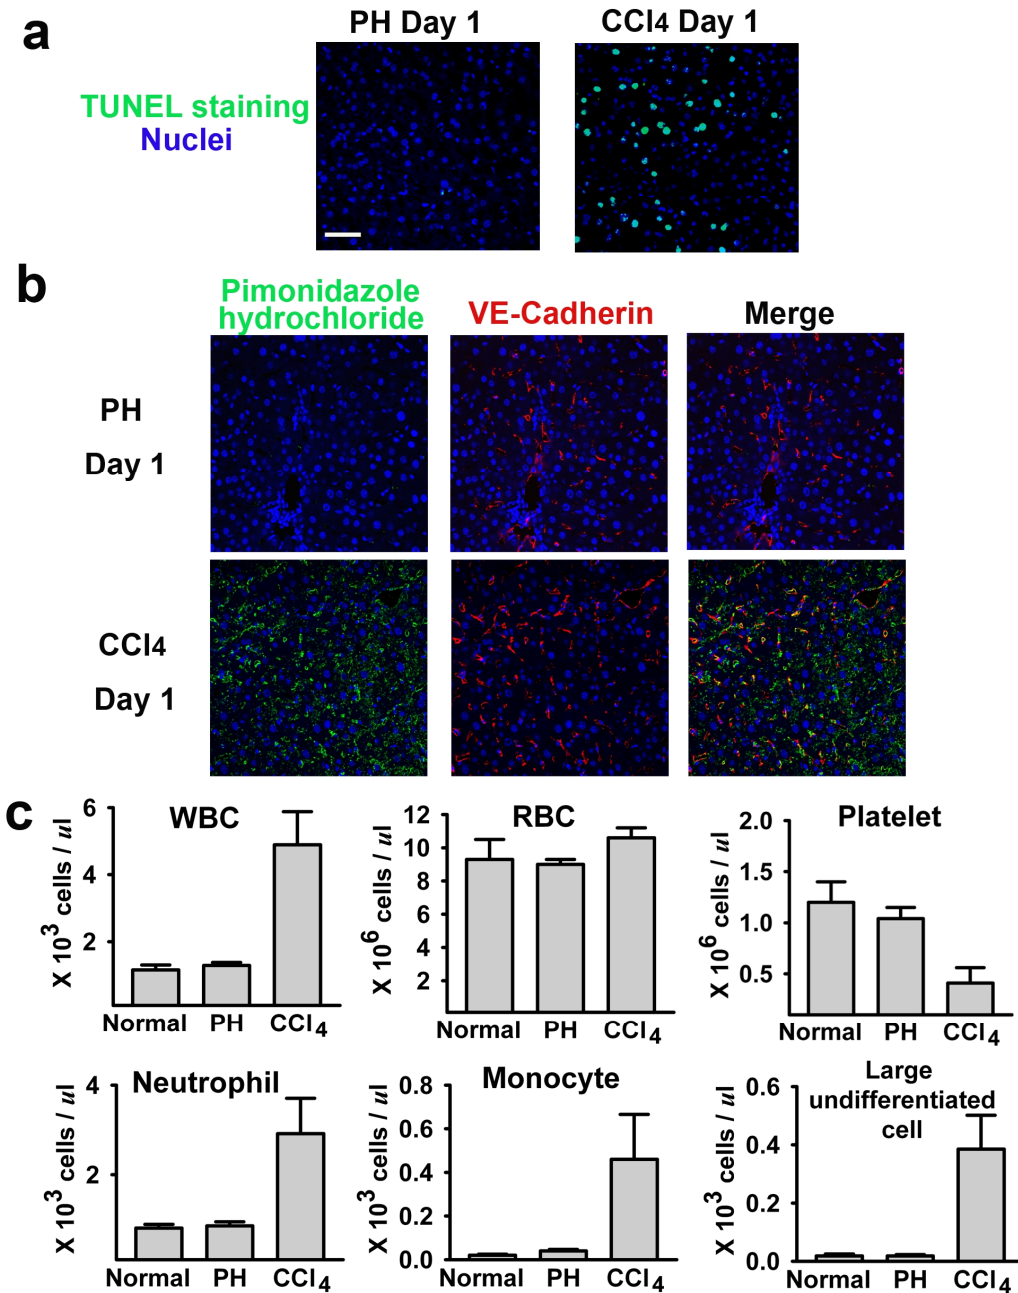

### Supplementary Fig. 2. Carbon tetrachloride (CCl<sub>4</sub>) injection, but not PH, induces cell apoptosis and hypoxia in the liver and promotes hematopoietic cell mobilization.

**a)** In contrast to CCl<sub>4</sub> injection that induces remarkable apoptosis in the liver, PH causes little apoptosis, as illustrated by TUNEL staining. TUNEL staining was performed using *In Situ* Cell Death Detection Kit (Roche Applied Science). Scale bar, 50μm. **b)** While significant hypoxia occurs in the liver 24 hours after CCl<sub>4</sub> injection, the residual liver lobes remains non-hypoxic 24 hours after PH. Tissue hypoxia was determined by Hypoxyprobe™-1 Kit (Chemicon, Billerica, MA). **c)** CCl<sub>4</sub> injection but not PH induces mobilization of inflammatory cells 24 hours after injury. Blood cell counting was performed using Advia 120 analyzer (Bayer, Germany). WBC, white blood cells; RBC, red blood cells.

## Supplementary Fig. 3

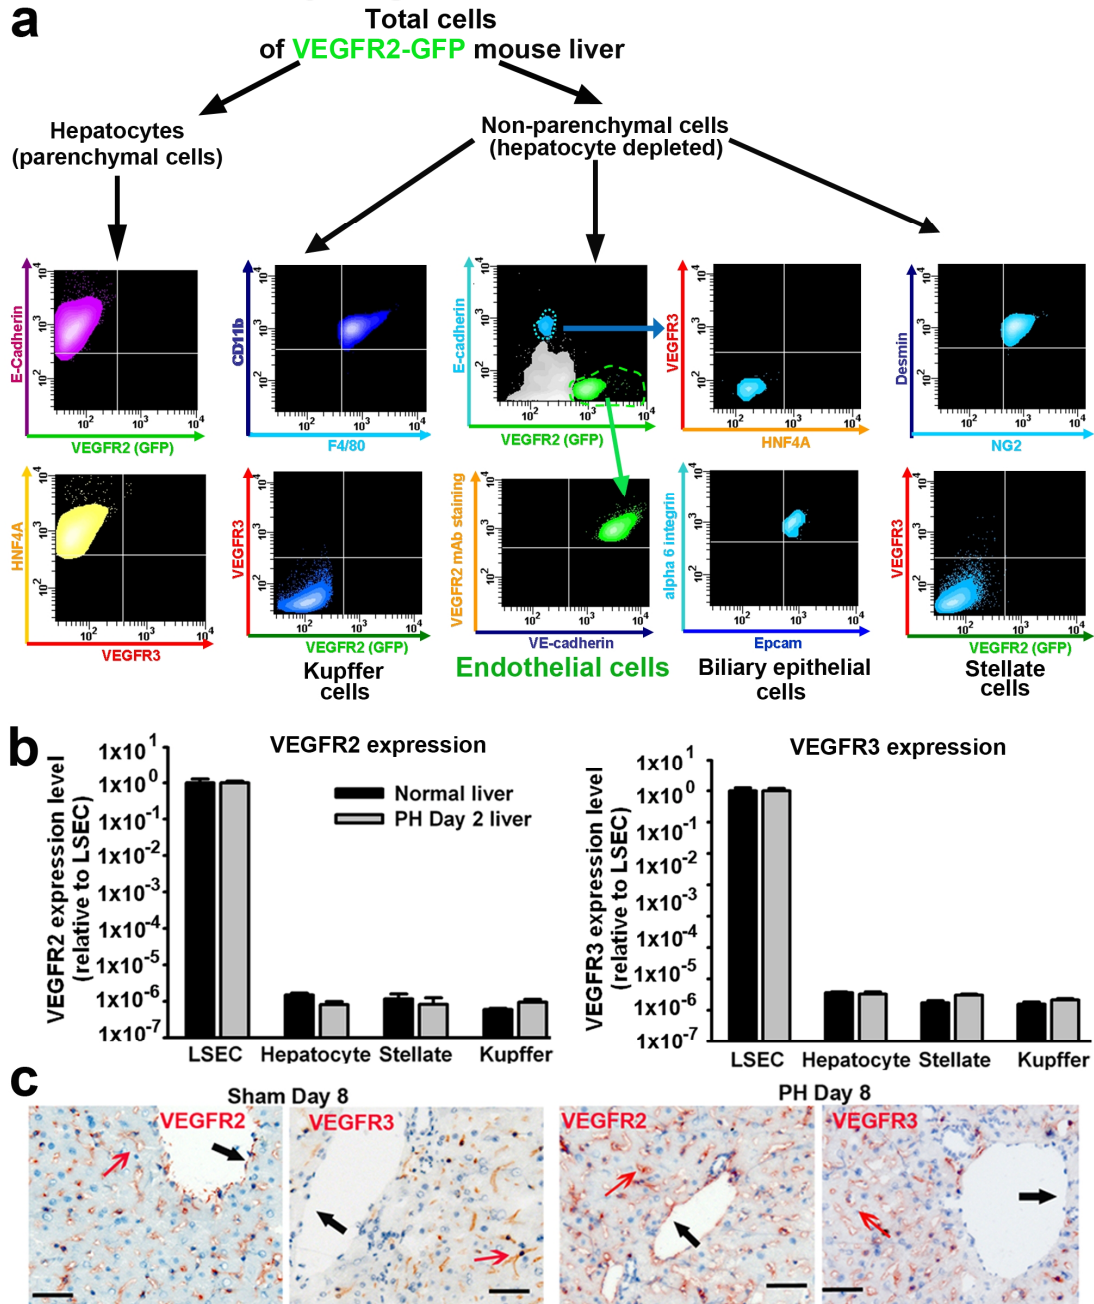

### Supplementary Fig. 3 Restricted expression of VEGFR2 and VEGFR3 to the liver ECs.

**a** In VEGFR2-GFP mouse whereby endogenous VEGFR2 promoter drives GFP expression, VEGFR2 (GFP) is only expressed by VE-cadherin<sup>+</sup> ECs but not other cell types, including E-cadherin<sup>+</sup> hepatocyte nuclear factor 4 $\alpha$  (HNF4A)<sup>+</sup> hepatocytes, E-cadherin<sup>+</sup> $\alpha$ 6 integrin<sup>+</sup>Epcam<sup>+</sup> biliary epithelial cells, NG2<sup>+</sup>desmin<sup>+</sup> stellate cells, and F4/80<sup>+</sup>CD11b<sup>+</sup> Kupffer cells.

**b** Expression profile of VEGFR2 and VEGFR3 in hepatocytes, LSECs, Stellate and Kupffer cells. Note the logarithmic axis of the expression level that clearly demonstrates the absence of VEGFR2 and VEGFR3 in other non-LSEC liver cell types.

**c** Immunohistochemical staining on liver frozen sections reveals VEGFR2 expression by both sinusoids (red arrow) and portal veins (black arrow), while VEGFR3 is primarily expressed on the sinusoids but absent in portal vein (black arrow), in either sham-operated (Sham) or PH liver. Scale bar, 100  $\mu$ m.

## Supplementary Fig. 4

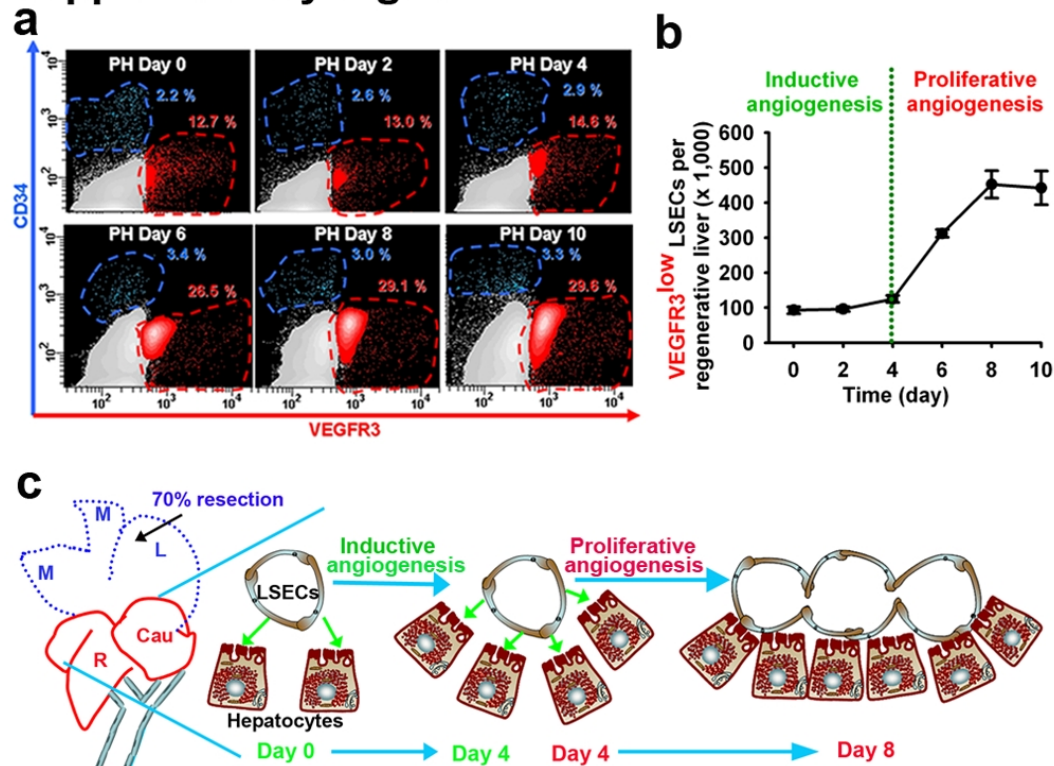

### Supplementary Fig. 4 Characterization of normal and regenerative LSECs.

a) Increase in VEGFR3<sup>+</sup>CD34<sup>-</sup> LSECs represents the predominant expanding vascular populations during liver regeneration. Although proliferation of the LSECs is low during the early inductive phases (days 1-3 after PH) of liver regeneration, the number of the LSECs increases during the proliferative angiogenic phase (days 4-8 after PH) of the liver regeneration.

b) Kinetics of VEGFR3<sup>low</sup>CD34<sup>-</sup> LSECs expansion during liver regeneration. The numbers of VEGFR3<sup>low</sup>CD34<sup>-</sup> population were quantified at the indicated time points, respectively.

c) Proposed schema describing the roles of LSECs in liver regeneration. Upon PH (day 0), LSECs initiate the proliferation of proximal hepatocytes by exerting “inductive signals”, possibly by releasing angiocrine factors. Day 4 post PH, there is a significant LSEC expansion (proliferative angiogenesis) to sustain hepatic reconstitution.

## Supplementary Fig. 5

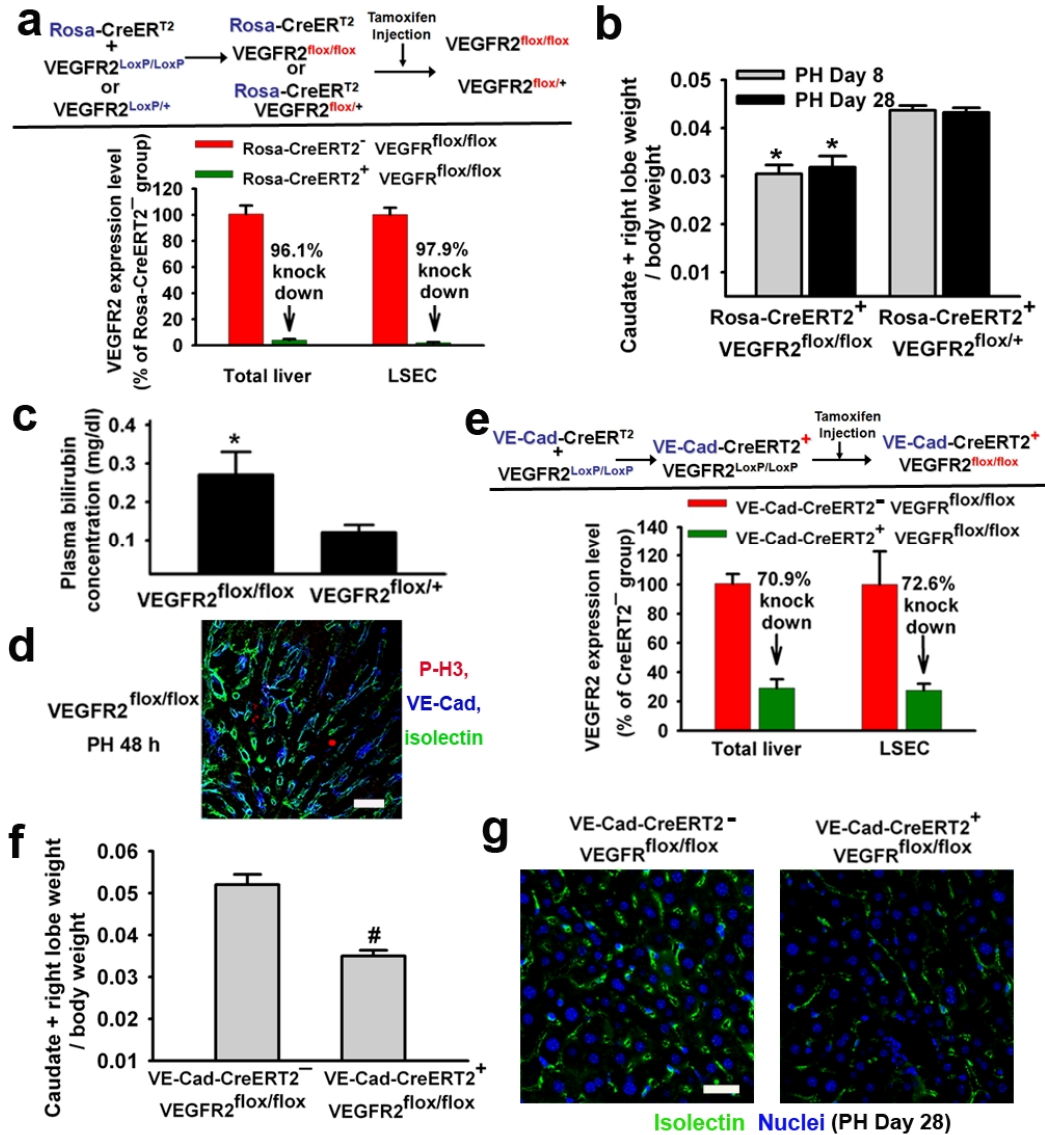

### Supplementary Fig. 5 Endothelial-specific knock down of VEGFR2 results in impaired liver regeneration.

**a)** Selective knockdown of VEGFR2 in liver endothelial cells after tamoxifen treatment of  $Rosa-CreER^{T2}VEGFR2^{flox/flox}$  mice,  $n = 4$ . **b)** Sustained inhibition of liver mass recovery in  $Rosa-CreER^{T2}VEGFR2^{flox/flox}$  with endothelial knockdown of VEGFR2. \*,  $P < 0.05$ , versus  $VEGFR2^{flox/+}$  group,  $n = 4$ . **c)** Impaired regeneration of liver function (increased plasma bilirubin level) in  $VEGFR2^{flox/flox}$  mice after PH. \*,  $P < 0.05$ , versus  $VEGFR2^{flox/+}$  group,  $n = 4$ . **d)** Despite the presence of intact functional VE-cadherin<sup>+</sup>isolectin<sup>+</sup> vasculature, there is profound absence of mitotic P-H3<sup>+</sup> hepatocytes in  $Rosa-CreER^{T2}VEGFR2^{flox/flox}$  mice. **e)** Generation of endothelial-specific VEGFR2 knockout mice.  $VE-cadherin-CreER^{T2}$  mice were crossed with  $VEGFR2^{LoxP/LoxP}$  mice. Treatment of tamoxifen to the resultant  $VE-cadherin-CreER^{T2}VEGFR2^{LoxP/LoxP}$  leads to  $VE-cadherin-CreER^{T2}VEGFR2^{flox/flox}$  mice that have endothelial-selective VEGFR2 deficiency. Quantification of endothelial-specific VEGFR2 knockdown in  $VE-cadherin-CreER^{T2}VEGFR2^{flox/flox}$  mice is shown in the bar graph. **f & g)** Impaired regeneration of liver mass (f) and isolectin<sup>+</sup> functional vessel (g) in  $VE-cadherin-CreER^{T2}VEGFR2^{flox/flox}$  mice. Scale bar, 50  $\mu$ m.

## Supplementary Fig. 6

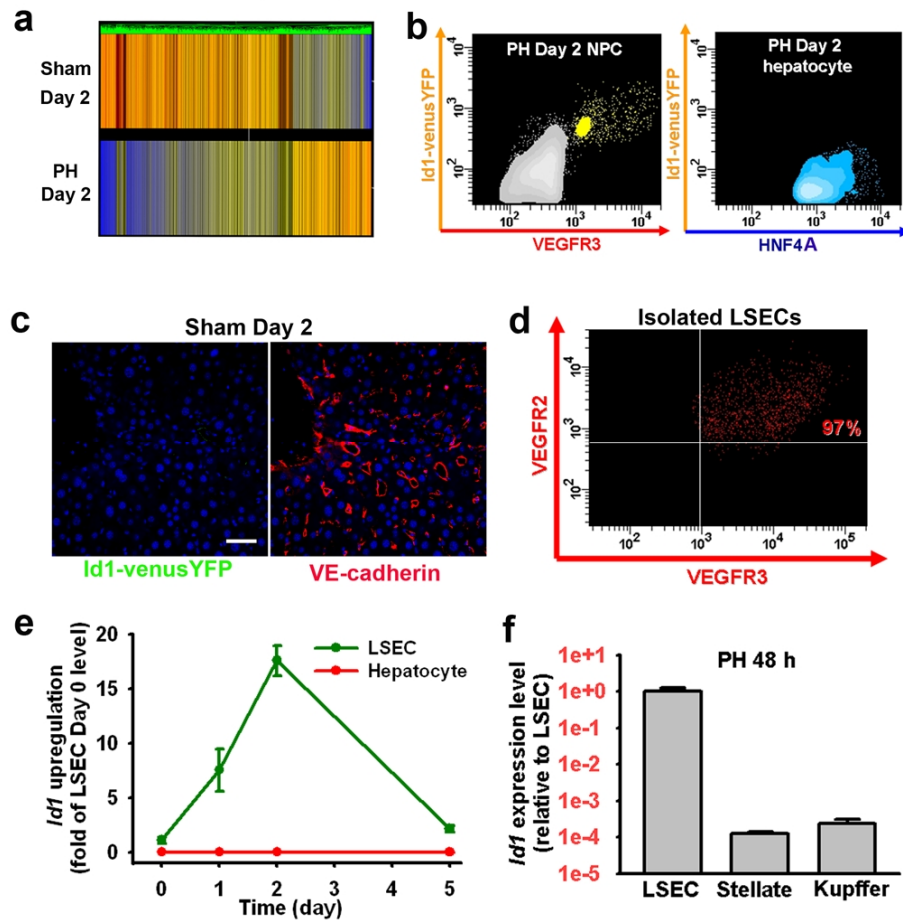

### Supplementary Fig. 6 Endothelial-specific upregulation of *Id1* in the regenerative liver.

**a)** Tree view of the comparison of microarray gene expression between the livers after PH and sham operation at day 2.

**b)** 48 hours after PH, in *Id1*-venusYFP reporter mice whereby YFP is driven by *Id1* expression, *Id1* (YFP) is only detected in VEGFR3<sup>+</sup> LSECs but not HNF4A<sup>+</sup> hepatocyte or other nonparenchymal cells.

**c)** Absence of *Id1* (YFP) upregulation in the liver of sham-operated *Id1*-YFP mouse two days after PH. Scale bar, 50 μm.

**d)** Isolation and characterization of LSECs. Flow cytometry shows that the majority of the isolated cells are LSECs that coexpress VEGFR2 and VEGFR3.

**e)** Kinetics of *Id1* upregulation in LSECs during liver regeneration. LSECs and hepatocytes were isolated from the mouse liver at the indicated time points after PH, and *Id1* expression level was measured by quantitative PCR and compared to the baseline levels at day 0. There was no *Id1* expression in hepatocytes at all the time points.

**f)** Absence of *Id1* activation in stellate and Kupffer cells after PH. Note the logarithmic axis of the expression level that clearly demonstrates the absence of *Id1* in other cell types.

## Supplementary Fig. 7

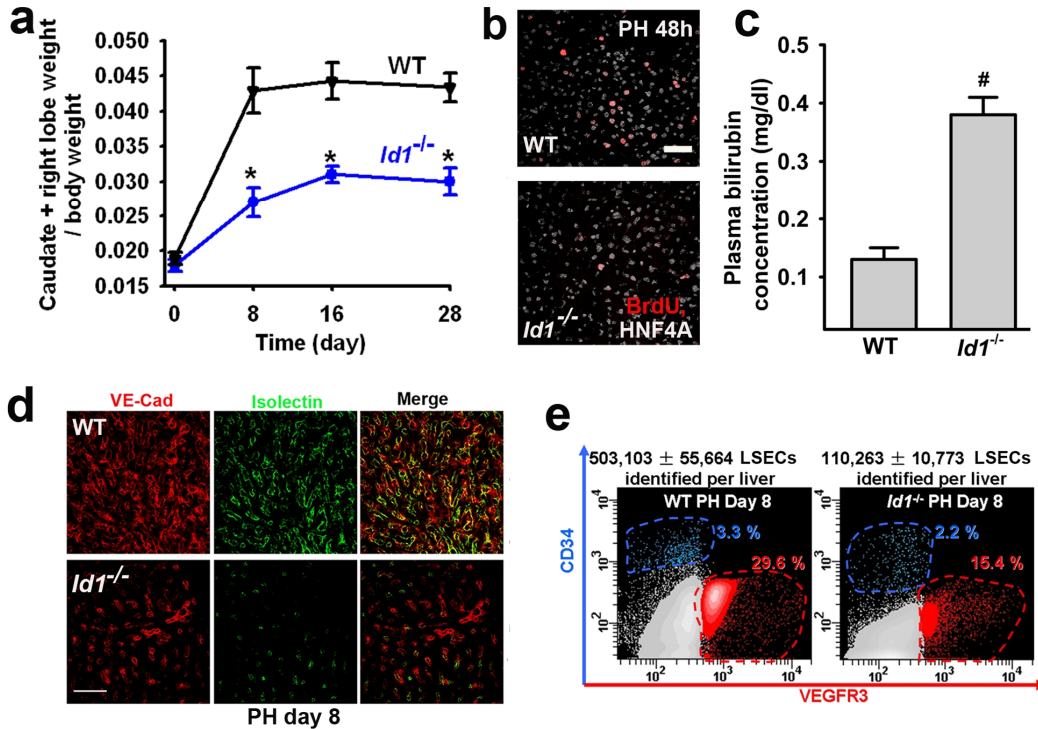

### Supplementary Fig. 7 Liver regeneration is impaired in *Id1*-deficient (*Id1*<sup>-/-</sup>) mice.

**a)** Sustained inhibition of liver mass recovery in *Id1*<sup>-/-</sup> mice. Throughout the indicated period, VEGF-A<sub>164</sub> injection failed to rescue the hepatic reconstitution. \**P* < 0.05 versus WT, *n* = 4.

**b)** Impairment of HNF4A<sup>+</sup> hepatocyte proliferation in the *Id1*<sup>-/-</sup> mice 48 hours after PH (PH 48h), revealed by the decreased incorporation of BrdU. Representative image of BrdU incorporation of each group is shown. Scale bar, 50  $\mu$ m.

**c)** Impaired regeneration of liver function (increased plasma bilirubin level) in *Id1*<sup>-/-</sup> mice after PH. #, *P* < 0.01, versus WT group, *n* = 3.

**d)** The generation of both VE-cadherin<sup>+</sup> and functional (isolectin<sup>+</sup>) vessels are inhibited in *Id1*<sup>-/-</sup> mice after PH. Representative image is shown. Scale bar, 50  $\mu$ m. Quantification of the inhibited assembly of VE-cadherin<sup>+</sup> and functional (isolectin<sup>+</sup>) vessels in *Id1*<sup>-/-</sup> mice after PH is shown in Fig. 3c in the text.

**e)** Polyvariate flow cytometry shows the impaired regeneration of VEGFR3<sup>+</sup>CD34<sup>-</sup> LSECs in the *Id1*<sup>-/-</sup> mice at day 8 after PH. Representative image is shown, and the blunted increase of VEGFR3<sup>+</sup>CD34<sup>-</sup> cell population per regenerative *Id1*<sup>-/-</sup> liver was compared to that of WT mice (top text panel).

## Supplementary Fig. 8

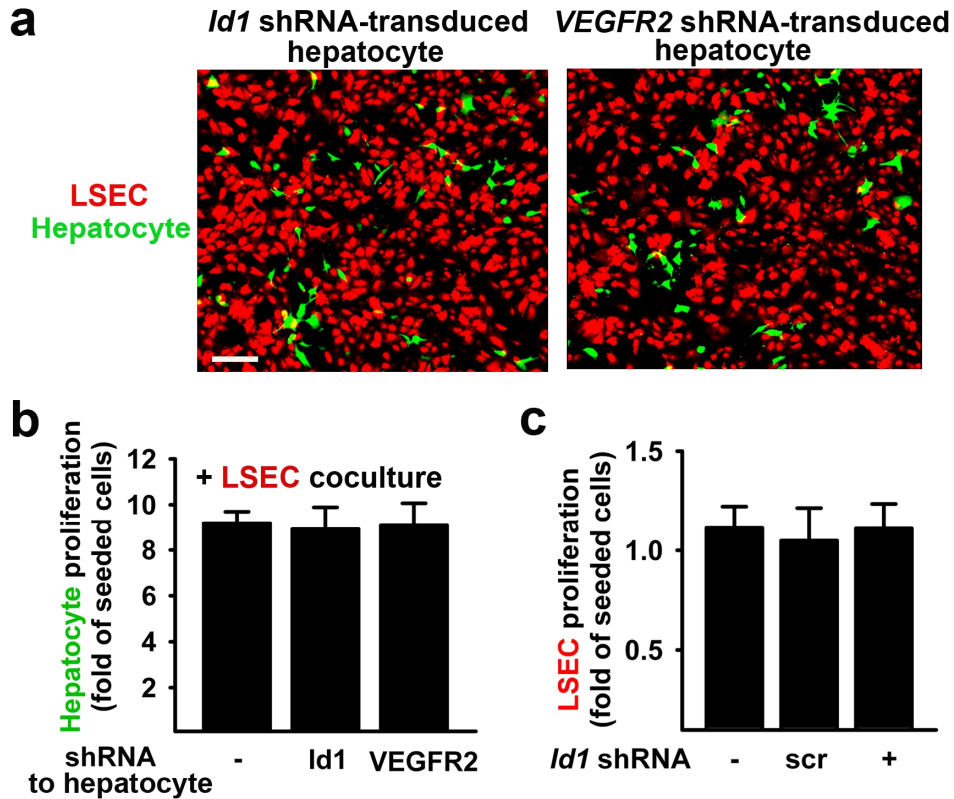

### Supplementary Fig. 8 *Id1*-dependent angiocrine effects on hepatocyte proliferation.

**a & b)** The EC-dependent stimulation of hepatocyte proliferation is not affected by *Id1* or *VEGFR2* gene knockdown in hepatocytes. Representative image (a) and the quantification of hepatocyte proliferation after incubation of LSEC (b) are shown. Primary hepatocytes were isolated from mouse liver, transduced with albumin-GFP reporter, and co-cultured with mCherry labeled LSEC monolayer for 2 weeks as described in “Methods”. Scale bar, 50  $\mu$ m;  $n = 4$ .

**c)** Absence of LSEC proliferation in the coculture system and endothelial survival was not influenced by *Id1* knockdown. Scr, scrambled shRNA;  $n = 4$ .



## Supplementary Fig. 9

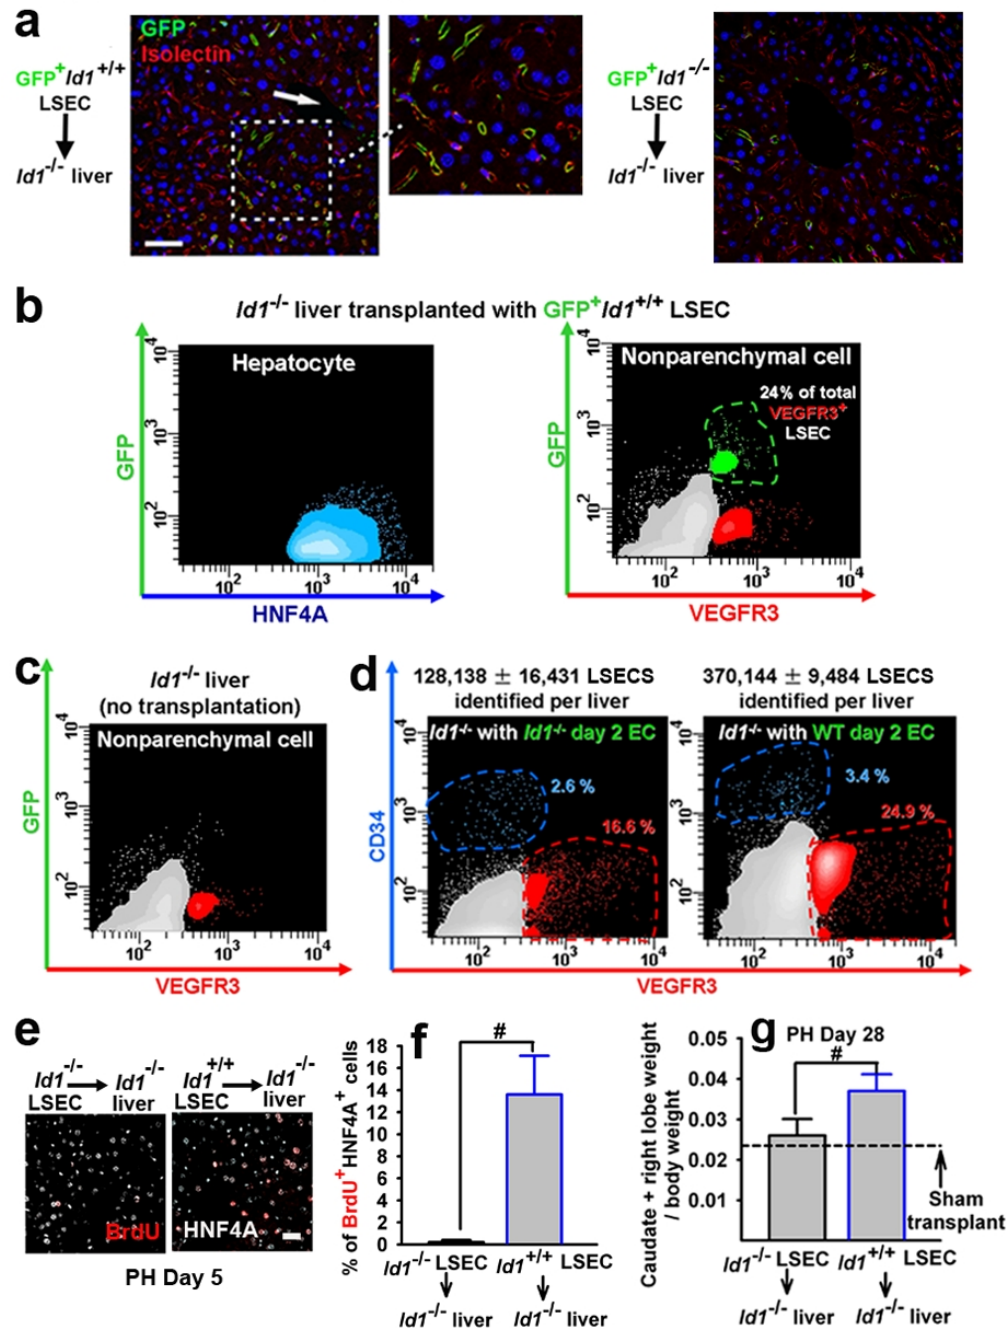

### Supplementary Fig. 9 Incorporation of the transplanted LSECs into the regenerating *Id1*<sup>-/-</sup> liver post PH.

a) *Id1*<sup>+/+</sup> or *Id1*<sup>-/-</sup> LSECs were isolated from WT mice at day 2 after PH, marked with lenti-GFP, and transplanted into the *Id1*<sup>-/-</sup> mice at day 2 after PH as described in the “Methods” and Fig. 3f. Regenerative *Id1*<sup>+/+</sup> LSECs incorporated into the *Id1*<sup>-/-</sup> liver sinusoid. Alexa 568-conjugated isolectin B4 (red) was i.v. injected to reveal the functional liver vasculature. Scale bar, 50 μm.

b) Engrafted GFP<sup>+</sup>*Id1*<sup>+/+</sup> LSECs exclusively reside in VEGFR3<sup>+</sup> LSEC population, but not other nonparenchymal cells or hepatocytes.

c) Absence of GFP<sup>+</sup> cells in the *Id1*<sup>-/-</sup> liver without transplantation.

**d)** Restored regeneration of VEGFR3<sup>+</sup>CD34<sup>-</sup> LSECs in the *Id1*<sup>-/-</sup> mouse liver after transplantation of *Id1*<sup>+/+</sup>GFP<sup>+</sup> LSECs. Representative flow cytometry image is shown, and the number of the regenerating VEGFR3<sup>+</sup>CD34<sup>-</sup> LSECs per liver post transplantation was quantified (top text panel).

**e & f)** Intrasplenic transplantation of regenerative *Id1*<sup>+/+</sup> LSECs, but not *Id1*<sup>-/-</sup> LSECs, effectively restores the proliferation of HNF4A<sup>+</sup> hepatocyte in the *Id1*<sup>-/-</sup> liver. Representative image (e) and the quantification of hepatocyte proliferation (f) are shown. **g)** Long-term restoration of *Id1*<sup>-/-</sup> liver mass reconstitution after transplantation of regenerative *Id1*<sup>+/+</sup> LSECs. Dashed line, the level of regenerative *Id1*<sup>-/-</sup> liver underwent PBS injection and splenectomy (sham transplant). #*P* < 0.05; *n* = 3.

## Supplementary Fig. 10

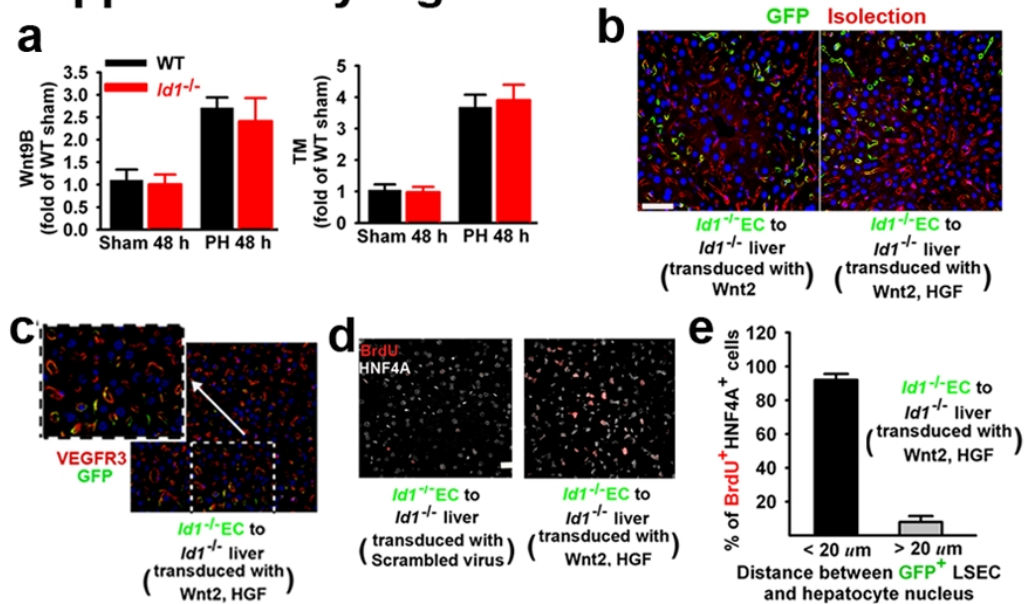

### Supplementary Fig. 10. Identification of Wnt2 and HGF as *Id1*-mediated paracrine factors derived from LSEC for liver regeneration.

**a)** 48 hours after PH, upregulation of paracrine cytokine Wnt2 and HGF but not Wnt9B and TM is inhibited in *Id1*<sup>-/-</sup> LSECs, as compared to WT LSECs. Alteration in the expression of Wnt2 and HGF in *Id1*<sup>-/-</sup> LSECs after PH is shown in Fig. 4.

**b)** Incorporation of the transplanted *Id1*<sup>-/-</sup> LSECs expressing various transduced genes into the *Id1*<sup>-/-</sup> liver. GFP<sup>+</sup>Wnt2<sup>+</sup> LSEC and GFP<sup>+</sup>Wnt2<sup>+</sup>HGF<sup>+</sup> LSEC showed similar levels of incorporation into the *Id1*<sup>-/-</sup> liver sinusoidal vasculature. Scale bar, 50 μm.

**c)** Incorporation of the engrafted GFP<sup>+</sup> LSECs into the lumen of VEGFR3<sup>+</sup> sinusoidal vasculature.

**d)** Intrasplenic transplantation of *Id1*<sup>-/-</sup>Wnt2<sup>+</sup>HGF<sup>+</sup> LSECs, but not *Id1*<sup>-/-</sup> LSECs, restores HNF4A<sup>+</sup> hepatocyte proliferation in the *Id1*<sup>-/-</sup> liver. Representative image is shown. Quantification of hepatocyte proliferation is shown in Fig. 4c. Scale bar, 25 μm.

**e)** Essential role of cellular proximity between transplanted LSECs and hepatocytes in stimulating hepatocyte mitosis by the transplanted GFP<sup>+</sup>*Id1*<sup>+/+</sup>Wnt2<sup>+</sup>HGF<sup>+</sup> vasculature in the *Id1*<sup>-/-</sup> liver.

## **Supplementary Table 1 Genetic alteration in the regenerative liver**

Upregulated and downregulated genes in the liver 2 days after PH (Altered Fold after PH) were compared to the sham-operated liver.

Genes that are upregulated 5-fold and downregulated to 30% of sham liver level are listed.

| <b>Gene Name</b> | <b>Altered Fold<br/>after PH</b> | <b>Description</b>                              |
|------------------|----------------------------------|-------------------------------------------------|
| 1430811_a_at     | 19.67                            | cell division cycle associated 1                |
| 1448899_s_at     | 19.53                            | RAD51 associated protein 1                      |
| 1419764_at       | 18.88                            | chitinase 3-like 3                              |
| 1418457_at       | 18.11                            | chemokine (C-X-C motif) ligand 14               |
| 1419669_at       | 18.08                            | proteinase 3                                    |
| 1435575_at       | 17.58                            | kinetochore associated 1                        |
| 1448453_at       | 16.86                            | hydroxysteroid dehydrogenase-1, delta<5>-3-beta |
| 1449708_s_at     | 16.73                            | checkpoint kinase 1 homolog (S. pombe)          |
| 1417938_at       | 15.98                            | RAD51 associated protein 1                      |
| 1422651_at       | 15.81                            | adiponectin, C1Q and collagen domain containing |
| 1451246_s_at     | 15.8                             | aurora kinase B                                 |
| 1434734_at       | 15.6                             | RAD54 homolog B (S. cerevisiae)                 |
| 1430574_at       | 15.58                            | cyclin-dependent kinase inhibitor 3             |
| 1416930_at       | 15.07                            | lymphocyte antigen 6 complex, locus D           |
| 1423774_a_at     | 14.77                            | protein regulator of cytokinesis 1              |
| 1417867_at       | 14.39                            | adipsin                                         |
| 1419513_a_at     | 14.33                            | ect2 oncogene                                   |
| 1416802_a_at     | 13.29                            | cell division cycle associated 5                |
| 1417910_at       | 13.27                            | cyclin A2                                       |
| 1416309_at       | 12.98                            | nucleolar and spindle associated protein 1      |
| 1419394_s_at     | 12.93                            | S100 calcium binding protein A8 (calgranulin A) |
| 1417926_at       | 12.82                            | leucine zipper protein 5                        |
| 1450677_at       | 12.68                            | checkpoint kinase 1 homolog (S. pombe)          |
| 1418026_at       | 12.61                            | exonuclease 1                                   |
| 1448205_at       | 12.1                             | cyclin B1, related sequence 1 ; cyclin B1       |
| 1452954_at       | 12.1                             | ubiquitin-conjugating enzyme E2C                |
| 1424638_at       | 11.98                            | cyclin-dependent kinase inhibitor 1A (P21)      |
| 1448756_at       | 11.95                            | S100 calcium binding protein A9 (calgranulin B) |
| 1454694_a_at     | 11.89                            | topoisomerase (DNA) II alpha                    |
| 1417911_at       | 11.42                            | cyclin A2                                       |
| 1424278_a_at     | 11.05                            | baculoviral IAP repeat-containing 5             |
| 1436723_at       | 10.99                            | FSH primary response 1                          |
| 1417541_at       | 10.91                            | helicase, lymphoid specific                     |
| 1424128_x_at     | 10.87                            | aurora kinase B                                 |

|              |       |                                                           |
|--------------|-------|-----------------------------------------------------------|
| 1423556_at   | 10.84 | aldo-keto reductase family 1, member B7                   |
| 1416299_at   | 10.69 | Shc SH2-domain binding protein 1                          |
| 1417761_at   | 10.58 | apolipoprotein A-IV                                       |
| 1456362_at   | 9.752 | cytochrome P450, family 11, subfamily b, polypeptide 1    |
| 1426817_at   | 9.668 | antigen identified by monoclonal antibody Ki 67           |
| 1452595_at   | 9.306 | ADAMTS4                                                   |
| 1416641_at   | 9.266 | ligase I, DNA, ATP-dependent                              |
| 1448650_a_at | 9.07  | polymerase (DNA directed), epsilon                        |
| 1437580_s_at | 8.995 | NIMA (never in mitosis gene a)-related expressed kinase 2 |
| 1452040_a_at | 8.99  | cell division cycle associated 3                          |
| 1449061_a_at | 8.783 | DNA primase, p49 subunit                                  |
| 1436504_x_at | 8.738 | apolipoprotein A-IV                                       |
| 1430139_at   | 8.687 | helicase, lymphoid specific                               |
| 1423809_at   | 8.511 | transcription factor 19                                   |
| 1418369_at   | 8.458 | DNA primase, p49 subunit                                  |
| 1421430_at   | 8.449 | RAD51-like 1 (S. cerevisiae)                              |
| 1449984_at   | 8.415 | chemokine (C-X-C motif) ligand 2                          |
| 1415885_at   | 8.251 | chromogranin B                                            |
| 1449133_at   | 8.183 | small proline-rich protein 1A                             |
| 1450156_a_at | 8.149 | hyaluronan mediated motility receptor (RHAMM)             |
| 1454854_at   | 8.047 | organic solute transporter beta                           |
| 1452458_s_at | 7.943 | peptidylprolyl isomerase (cyclophilin) like 5             |
| 1450352_at   | 7.867 | melatonin receptor 1A                                     |
| 1433888_at   | 7.848 | ATPase, Ca <sup>++</sup> transporting, plasma membrane 2  |
| 1448804_at   | 7.827 | cytochrome P450, family 11, subfamily a, polypeptide 1    |
| 1419735_at   | 7.753 | casein kappa                                              |
| 1451064_a_at | 7.678 | phosphoserine aminotransferase 1                          |
| 1428518_at   | 7.51  | myeloid leukemia factor 1 interacting protein             |
| 1452260_at   | 7.423 | cell death-inducing DFFA-like effector c                  |
| 1448314_at   | 7.2   | cell division cycle 2 homolog A (S. pombe)                |
| 1450708_at   | 7.184 | secretogranin II                                          |
| 1422016_a_at | 7.153 | centromere autoantigen H                                  |
| 1449171_at   | 7.124 | Ttk protein kinase                                        |
| 1422926_at   | 7.088 | melanocortin 2 receptor                                   |
| 1415938_at   | 7.034 | serine peptidase inhibitor, Kazal type 3                  |
| 1418728_at   | 7.03  | steroidogenic acute regulatory protein                    |
| 1424629_at   | 6.967 | breast cancer 1                                           |
| 1421546_a_at | 6.942 | Rac GTPase-activating protein 1                           |
| 1449201_at   | 6.899 | steroidogenic acute regulatory protein                    |
| 1422462_at   | 6.882 | ubiquitin-conjugating enzyme E2T (putative)               |
| 1418729_at   | 6.836 | steroidogenic acute regulatory protein                    |
| 1451128_s_at | 6.833 | kinesin family member 22                                  |

|              |       |                                                     |
|--------------|-------|-----------------------------------------------------|
| 1425895_a_at | 6.811 | inhibitor of DNA binding 1                          |
| 1438434_at   | 6.757 | Rho GTPase activating protein 11A                   |
| 1428066_at   | 6.756 | DNA segment, Chr X, Immunex 50, expressed           |
| 1437187_at   | 6.731 | E2F transcription factor 7                          |
| 1450971_at   | 6.639 | growth arrest and DNA-damage-inducible 45 beta      |
| 1425451_s_at | 6.541 | chitinase 3-like 3 ; chitinase 3-like 4             |
| 1455983_at   | 6.538 | cell division cycle associated 2                    |
| 1434748_at   | 6.5   | cytoskeleton associated protein 2                   |
| 1415949_at   | 6.463 | carboxypeptidase E                                  |
| 1435306_a_at | 6.287 | kinesin family member 11                            |
| 1424143_a_at | 6.283 | retroviral integration site 2                       |
| 1419127_at   | 6.213 | neuropeptide Y                                      |
| 1422878_at   | 6.197 | synaptotagmin XII                                   |
| 1439695_a_at | 6.194 | M-phase phosphoprotein 1                            |
| 1424144_at   | 6.19  | retroviral integration site 2                       |
| 1450920_at   | 6.185 | cyclin B2                                           |
| 1451204_at   | 6.064 | scavenger receptor class A, member 5 (putative)     |
| 1449207_a_at | 6.061 | kinesin family member 20A                           |
| 1417939_at   | 6.037 | RAD51 associated protein 1                          |
| 1423920_at   | 6.036 | barren homolog (Drosophila)                         |
| 1454607_s_at | 6.027 | phosphoserine aminotransferase 1                    |
| 1423525_at   | 6.024 | microtubule associated serine/threonine kinase-like |
| 1422916_at   | 6.015 | fibroblast growth factor 21                         |
| 1427167_at   | 5.984 | expressed sequence AI448196                         |
| 1437611_x_at | 5.958 | kinesin family member 2C                            |
| 1436847_s_at | 5.928 | cell division cycle associated 8                    |
| 1449877_s_at | 5.921 | kinesin family member C1                            |
| 1448113_at   | 5.86  | stathmin 1                                          |
| 1424156_at   | 5.859 | retinoblastoma-like 1 (p107)                        |
| 1434195_at   | 5.856 | protease, serine, 35                                |
| 1440924_at   | 5.826 | M-phase phosphoprotein 1                            |
| 1433892_at   | 5.815 | sperm associated antigen 5                          |
| 1437093_at   | 5.798 | dynein, axonemal, intermediate chain 1              |
| 1448466_at   | 5.721 | cell division cycle associated 5                    |
| 1422960_at   | 5.658 | steroid 5 alpha-reductase 2                         |
| 1439436_x_at | 5.601 | inner centromere protein                            |
| 1419944_at   | 5.595 | DNA segment, Chr 4, ERATO Doi 639, expressed        |
| 1437716_x_at | 5.571 | kinesin family member 22                            |
| 1427102_at   | 5.554 | schlafen 4                                          |
| 1417625_s_at | 5.469 | chemokine orphan receptor 1                         |
| 1429273_at   | 5.42  | BMP-binding endothelial regulator                   |
| 1418149_at   | 5.394 | chromogranin A                                      |

|              |       |                                                                       |
|--------------|-------|-----------------------------------------------------------------------|
| 1434473_at   | 5.339 | solute carrier family 16 (monocarboxylic acid transporters)           |
| 1424321_at   | 5.313 | replication factor C (activator 1) 4                                  |
| 1428481_s_at | 5.311 | cell division cycle associated 8                                      |
| 1448529_at   | 5.305 | thrombomodulin                                                        |
| 1422925_s_at | 5.297 | acyl-CoA thioesterase 3                                               |
| 1420804_s_at | 5.269 | C-type lectin domain family 4, member d                               |
| 1427707_a_at | 5.245 | Tal1 interrupting locus                                               |
| 1448226_at   | 5.24  | ribonucleotide reductase M2                                           |
| 1416431_at   | 5.232 | tubulin, beta 6                                                       |
| 1417419_at   | 5.206 | cyclin D1                                                             |
| 1449773_s_at | 5.203 | growth arrest and DNA-damage-inducible 45 beta                        |
| 1448834_at   | 5.173 | forkhead box M1                                                       |
| 1433966_x_at | 5.159 | asparagine synthetase                                                 |
| 1417273_at   | 5.133 | pyruvate dehydrogenase kinase, isoenzyme 4                            |
| 1448127_at   | 5.124 | ribonucleotide reductase M1                                           |
| 1459897_a_at | 5.073 | suprabasin                                                            |
| 1420380_at   | 5.069 | chemokine (C-C motif) ligand 2                                        |
| 1437370_at   | 5.069 | shugoshin-like 2 ( <i>S. pombe</i> )                                  |
| 1420438_at   | 5.06  | orosomuroid 2                                                         |
| 1418456_a_at | 5.037 | chemokine (C-X-C motif) ligand 14                                     |
| 1448507_at   | 5.028 | EF hand domain containing 1                                           |
| 1449586_at   | 4.95  | plakophilin 1                                                         |
| 1448929_at   | 4.939 | coagulation factor XIII, A1 subunit                                   |
| 1427094_at   | 4.929 | polymerase (DNA directed), epsilon 2 (p59 subunit)                    |
| 1422583_at   | 4.928 | RAB3B, member RAS oncogene family                                     |
| 1425663_at   | 4.91  | interleukin 1 receptor antagonist                                     |
| 1415878_at   | 4.873 | ribonucleotide reductase M1                                           |
| 1417450_a_at | 4.871 | transforming, acidic coiled-coil containing protein 3                 |
| 1439827_at   | 4.818 | ADAMTS12                                                              |
| 1439208_at   | 4.807 | checkpoint kinase 1 homolog ( <i>S. pombe</i> )                       |
| 1423110_at   | 4.793 | procollagen, type I, alpha 2                                          |
| 1438161_s_at | 4.773 | replication factor C (activator 1) 4                                  |
| 1421228_at   | 4.761 | chemokine (C-C motif) ligand 7                                        |
| 1451095_at   | 4.731 | asparagine synthetase                                                 |
| 1434767_at   | 4.705 | expressed sequence C79407                                             |
| 1425341_at   | 4.699 | potassium channel, subfamily K, member 3                              |
| 1427161_at   | 4.67  | centromere autoantigen F                                              |
| 1439394_x_at | 4.67  | cell division cycle 20 homolog ( <i>S. cerevisiae</i> )               |
| 1426601_at   | 4.586 | solute carrier family 37 (glycerol-3-phosphate transporter), member 1 |
| 1427838_at   | 4.575 | tubulin, beta 2                                                       |
| 1451358_a_at | 4.516 | Rac GTPase-activating protein 1                                       |
| 1448377_at   | 4.496 | secretory leukocyte peptidase inhibitor                               |

|              |       |                                                        |
|--------------|-------|--------------------------------------------------------|
| 1416558_at   | 4.49  | maternal embryonic leucine zipper kinase               |
| 1419943_s_at | 4.489 | cyclin B1                                              |
| 1430617_at   | 4.391 | Opa interacting protein 5                              |
| 1426858_at   | 4.376 | inhibin beta-B                                         |
| 1436791_at   | 4.365 | wingless-related MMTV integration site 5A              |
| 1455691_at   | 4.364 | cytochrome P450, family 21, subfamily a, polypeptide 1 |
| 1417971_at   | 4.344 | nurim (nuclear envelope membrane protein)              |
| 1421731_a_at | 4.33  | flap structure specific endonuclease 1                 |
| 1437094_x_at | 4.309 | dynein, axonemal, intermediate chain 1                 |
| 1423877_at   | 4.307 | chromatin assembly factor 1, subunit B (p60)           |
| 1423100_at   | 4.305 | FBJ osteosarcoma oncogene                              |
| 1428167_a_at | 4.24  | myelin protein zero-like 1                             |
| 1438665_at   | 4.232 | sphingomyelin phosphodiesterase 3, neutral             |
| 1417420_at   | 4.196 | cyclin D1                                              |
| 1442339_at   | 4.19  | stefin A2 like 1                                       |
| 1441835_x_at | 4.185 | myotubularin related protein 11                        |
| 1439478_at   | 4.183 | acyl-CoA thioesterase 2                                |
| 1460550_at   | 4.169 | myotubularin related protein 11                        |
| 1452314_at   | 4.12  | kinesin family member 11                               |
| 1451306_at   | 4.096 | cell division cycle associated 7 like                  |
| 1427541_x_at | 4.089 | hyaluronan mediated motility receptor (RHAMM)          |
| 1417878_at   | 4.081 | E2F transcription factor 1                             |
| 1428168_at   | 4.078 | myelin protein zero-like 1                             |
| 1422694_at   | 4.056 | tweety homolog 1 (Drosophila)                          |
| 1429295_s_at | 4.04  | thyroid hormone receptor interactor 13                 |
| 1421375_a_at | 4.035 | S100 calcium binding protein A6 (calcyclin)            |
| 1452534_a_at | 4.024 | high mobility group box 2                              |
| 1450670_at   | 4.023 | dopamine beta hydroxylase                              |
| 1437785_at   | 4.016 | ADAMTS9                                                |
| 1426002_a_at | 4.012 | cell division cycle 7 (S. cerevisiae)                  |
| 1427357_at   | 4     | cytidine deaminase                                     |
| 1418311_at   | 0.3   | fructosamine 3 kinase                                  |
| 1428447_at   | 0.297 | transmembrane protein 14A                              |
| 1451721_a_at | 0.296 | histocompatibility 2, class II antigen A, beta 1       |
| 1419476_at   | 0.291 | ADAM-like, decysin 1                                   |
| 1423348_at   | 0.29  | frizzled homolog 8 (Drosophila)                        |
| 1457563_at   | 0.29  | epidermal growth factor receptor                       |
| 1425918_at   | 0.289 | EGL nine homolog 3 (C. elegans)                        |
| 1452431_s_at | 0.289 | histocompatibility 2, class II antigen A, alpha        |
| 1457871_at   | 0.288 | collectin liver 1                                      |
| 1446254_at   | 0.286 | DEP domain containing 6 (Depdc6), mRNA                 |
| 1437916_at   | 0.285 | Kruppel-like factor 13 (Klf13), mRNA                   |



|              |        |                                                                           |
|--------------|--------|---------------------------------------------------------------------------|
| 1418600_at   | 0.284  | Kruppel-like factor 1 (erythroid)                                         |
| 1437273_at   | 0.283  | HtrA serine peptidase 4                                                   |
| 1446844_at   | 0.28   | coiled-coil-helix-coiled-coil-helix domain containing 7                   |
| 1420342_at   | 0.276  | ganglioside-induced differentiation-associated-protein 10                 |
| 1437953_at   | 0.275  | preimplantation protein 4                                                 |
| 1453191_at   | 0.275  | procollagen, type XXVII, alpha 1                                          |
| 1453588_at   | 0.272  | carbonic anhydrase 3                                                      |
| 1452944_at   | 0.272  | synaptogyrin 2                                                            |
| 1428885_at   | 0.27   | synaptogyrin 2 ; arylformamidase                                          |
| 1418028_at   | 0.262  | dopachrome tautomerase                                                    |
| 1456973_at   | 0.254  | Modulator recognition factor 2 (Mrf2)                                     |
| 1426850_a_at | 0.253  | mitogen activated protein kinase kinase 6                                 |
| 1448092_x_at | 0.253  | serine (or cysteine) peptidase inhibitor, clade A, member 4, pseudogene 1 |
| 1420549_at   | 0.252  | guanylate nucleotide binding protein 1                                    |
| 1450830_a_at | 0.25   | phosphodiesterase 6C, cGMP specific, cone, alpha prime                    |
| 1416194_at   | 0.248  | cytochrome P450, family 4, subfamily b, polypeptide 1                     |
| 1429549_at   | 0.246  | procollagen, type XXVII, alpha 1                                          |
| 1430893_at   | 0.244  | major urinary protein 1                                                   |
| 1417600_at   | 0.242  | solute carrier family 15 (H <sup>+</sup> /peptide transporter), member 2  |
| 1444296_a_at | 0.237  | serine (or cysteine) peptidase inhibitor, clade A, member 4, pseudogene 1 |
| 1431240_at   | 0.236  | C-type lectin domain family 2, member h                                   |
| 1435188_at   | 0.235  | similar to chromosome 1 open reading frame 51                             |
| 1444166_at   | 0.227  | thyroid hormone responsive SPOT14 homolog (Rattus)                        |
| 1423397_at   | 0.22   | UDP glucuronosyltransferase 2 family, polypeptide B38                     |
| 1419146_a_at | 0.22   | glucokinase                                                               |
| 1424673_at   | 0.219  | C-type lectin domain family 2, member h                                   |
| 1449409_at   | 0.196  | sulfotransferase family, cytosolic, 1C, member 2                          |
| 1427981_a_at | 0.194  | cysteine sulfinic acid decarboxylase                                      |
| 1449816_at   | 0.192  | sulfotransferase family 5A, member 1                                      |
| 1420531_at   | 0.175  | hydroxysteroid dehydrogenase-5, delta<sup>5</sup>-3-beta                  |
| 1424969_s_at | 0.17   | uridine phosphorylase 2                                                   |
| 1437584_at   | 0.153  | Transcribed locus                                                         |
| 1424737_at   | 0.15   | thyroid hormone responsive SPOT14 homolog (Rattus)                        |
| 1426516_a_at | 0.15   | lipin 1                                                                   |
| 1418857_at   | 0.145  | solute carrier family 13, member 2                                        |
| 1444297_at   | 0.136  | serine (or cysteine) peptidase inhibitor, clade A, member 4, pseudogene 1 |
| 1451548_at   | 0.124  | uridine phosphorylase 2                                                   |
| 1426037_a_at | 0.118  | regulator of G-protein signaling 16                                       |
| 1415965_at   | 0.118  | stearoyl-Coenzyme A desaturase 1                                          |
| 1460256_at   | 0.108  | carbonic anhydrase 3                                                      |
| 1460059_at   | 0.105  | uridine phosphorylase 2                                                   |
| 1444032_at   | 0.0878 | Kidney expressed gene 1 (Keg1), mRNA                                      |

|              |        |                                                                     |
|--------------|--------|---------------------------------------------------------------------|
| 1455265_a_at | 0.0833 | regulator of G-protein signaling 16                                 |
| 1460258_at   | 0.0801 | leukocyte cell derived chemotaxin 1                                 |
| 1422973_a_at | 0.0697 | thyroid hormone responsive SPOT14 homolog (Rattus)                  |
| 1422100_at   | 0.0618 | cytochrome P450, family 7, subfamily a, polypeptide 1               |
| 1449347_a_at | 0.0589 | X-linked lymphocyte-regulated 4B ; X-linked lymphocyte-regulated 4A |
| 1438743_at   | 0.0565 | cytochrome P450, family 7, subfamily a, polypeptide 1               |
| 1416193_at   | 0.0539 | carbonic anhydrase 1                                                |
| 1449309_at   | 0.0366 | cytochrome P450, family 8, subfamily b, polypeptide 1               |
